# Supplementary material
Source: PubMed Central journal article supplement (PMC3400377)
Supplement: cn3000197_si_001.pdf [file cn3000197_si_001.pdf]

Supporting Information

**Multicolor Fluorescence Imaging of Traumatic Brain Injury in a Cryolesion Mouse Model**

Bryan A. Smith<sup>1\*</sup>, Bang-Wen Xie<sup>2‡</sup>, Ermond R. van Beek<sup>2</sup>, Ivo Que<sup>2</sup>, Vicky Blankevoort<sup>2</sup>, Shuzhang Xiao<sup>1</sup>, Erin L. Cole<sup>1</sup>, Mathias Hoehn<sup>3</sup>, Eric L. Kaijzel<sup>2</sup>, Clemens W.G.M Löwik<sup>2</sup> and Bradley D. Smith<sup>1</sup>

<sup>1</sup>*Department of Chemistry and Biochemistry, 236 Nieuwland Science Hall, University of Notre Dame, Notre Dame, IN 46556;* <sup>2</sup>*Molecular Endocrinology and Molecular Imaging, Department of Endocrinology, Leiden University Medical Center, Albinusdreef 2, 2333 ZA Leiden, The Netherlands;* <sup>3</sup>*Max Planck Institute for Neurological Research, Gleuelerstrasse 50, D-50931, Cologne, Germany*

Table of Contents

|                                                             |         |
|-------------------------------------------------------------|---------|
| 1. Representative ROI image                                 | S2      |
| 2. 60 s Cryolesion In Vivo and Ex Vivo Image Quantification | S3-S6   |
| 3. Fluorescence Histology                                   | S7-S9   |
| 4. 20 s Cryolesion Images and Quantification                | S10-S13 |
| 5. Multicolor Imaging with PSS-794 and Tracer-653           | S14-S15 |
| 6. Tracer-653 in Healthy Mice                               | S16     |
| 7. Evans Blue and Tracer-653 in TBI Progression Studies     | S17     |

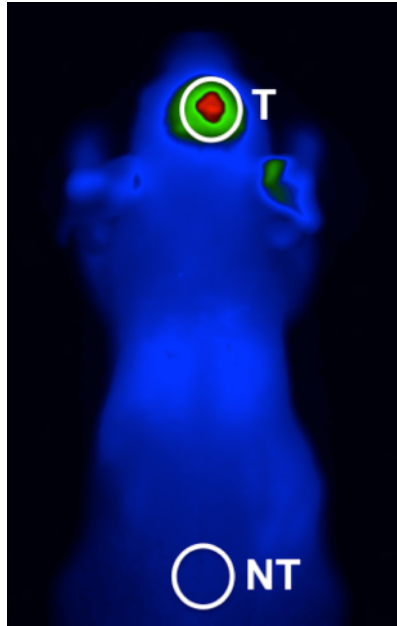

**Figure S1.** Representative *in vivo* epi-fluorescence image with typical region of interest (ROI) shapes used to measure mean pixel intensities for the target (T) and the non-target (NT).

**Table S1.** *In vivo* T/NT values for PSS-794, Tracer-794, and Annexin-Vivo 750 The data is displayed in graphical form in Figure 3. T/NT values  $\pm$  standard error of the mean.

|      | <b>PSS-794</b>                 | <b>Tracer-794</b> | <b>Annexin-Vivo<br/>750</b>    |
|------|--------------------------------|-------------------|--------------------------------|
| 0 h  | 2.52 $\pm$ 0.07                | 2.52 $\pm$ 0.42   | 2.57 $\pm$ 0.24                |
| 3 h  | 6.77 $\pm$ 0.47 <sup>***</sup> | 3.52 $\pm$ 0.59   | 3.69 $\pm$ 0.49 <sup>***</sup> |
| 6 h  | 7.32 $\pm$ 0.78 <sup>*</sup>   | 3.81 $\pm$ 0.90   | 4.09 $\pm$ 0.28 <sup>*</sup>   |
| 24 h | 5.93 $\pm$ 1.15                | 2.97 $\pm$ 0.69   | 4.87 $\pm$ 0.54                |

\* P < 0.01

\*\* P < 0.02

\*\*\* P < 0.003

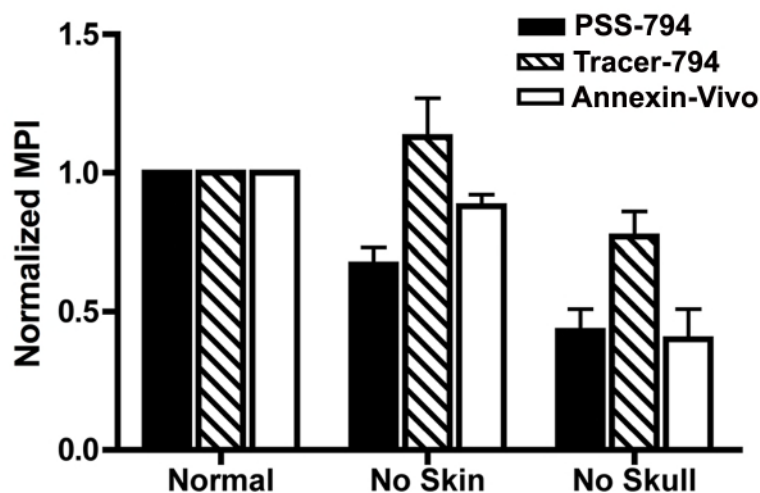

**Figure S2.** Comparison of probe localization at the cryoinjury site in different tissues. A pre-cooled metal cylinder was applied to the heads of mice for 60 s, and each mouse was dosed with either PSS-794, Tracer-794, or Annexin-Vivo 750. The mice were imaged 24 h later, sacrificed and imaged again with the skin removed (no skin), and with both the skin and skull removed (no skull). With each image, a region of interest (ROI) was drawn around the cryoinjury site; the mean pixel intensity (MPI) was recorded and normalized to the mean pixel intensity of the *in vivo* (normal) image. Normalized MPI  $\pm$  standard error of the mean. N = 5.

**Table S2.** Normalized mean pixel intensities of PSS-794, Tracer-794, and Annexin-Vivo 750 at the cryoinjury site. The data is displayed in graphical form in Figure S2. Normalized mean pixel intensities  $\pm$  standard error of the mean.

|          | <b>PSS-794</b>                 | <b>Tracer-794</b> | <b>Annexin-Vivo<br/>750</b>  |
|----------|--------------------------------|-------------------|------------------------------|
| Normal   | 1.00 $\pm$ 0.00                | 1.00 $\pm$ 0.00   | 1.00 $\pm$ 0.00              |
| No Skin  | 0.67 $\pm$ 0.06 <sup>*a</sup>  | 1.14 $\pm$ 0.14   | 0.88 $\pm$ 0.04 <sup>b</sup> |
| No Skull | 0.43 $\pm$ 0.08 <sup>**a</sup> | 0.77 $\pm$ 0.09   | 0.40 $\pm$ 0.11 <sup>b</sup> |

<sup>a</sup>PSS-794 No Skin vs No Skull = P < 0.02

<sup>b</sup>Annexin-Vivo No Skin vs No Skull = P < 0.03

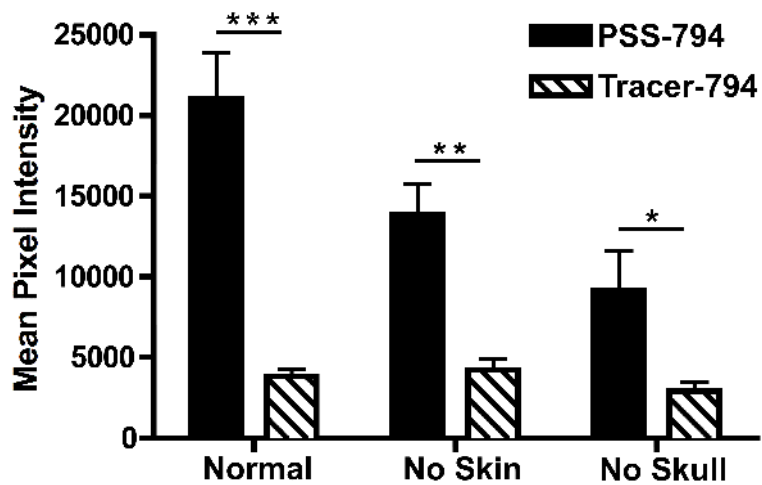

**Figure S3.** Absolute mean pixel intensities used to create the data in Figure S2 and Table S2. Error bars are  $\pm$  standard error of the mean. \*  $P < 0.05$ , \*\*  $P < 0.01$ , \*\*\*  $P < 0.001$ .  $N = 5$ .

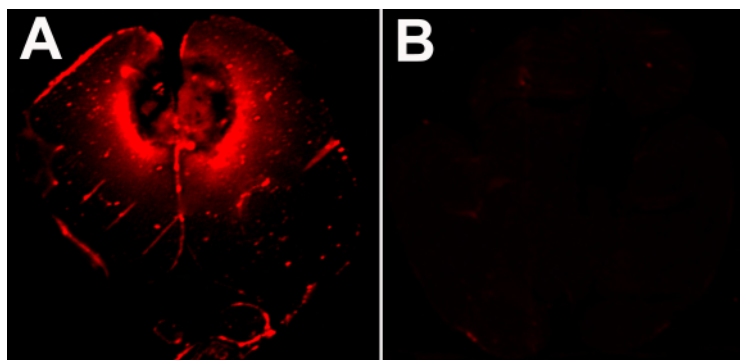

**Figure S4.** *Ex vivo* near-infrared fluorescence images of cryoinjured brain sections containing PSS-794 (A) or Tracer-794 (B). A pre-cooled metal cylinder was applied to the heads of mice for 60 s, and each mouse was dosed with either PSS-794 (3.0 mg/kg) or Tracer-794 (3.0 mg/kg). After an additional 24 h, the mice were sacrificed and the brains were excised. Brains were flash frozen in OCT and cryosectioned at 10  $\mu$ M thickness. The images show PSS-794 around the site of cryolesion, while a negligible amount of Tracer-794 remains in the brain after 24 h.

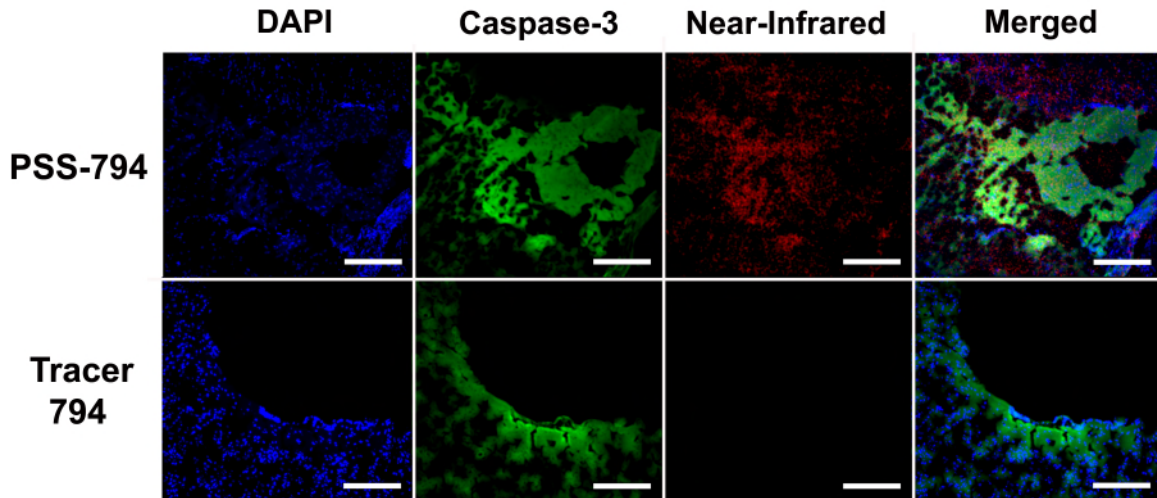

**Figure S5.** Fluorescence microscopy of brain cryoinjury histological sections. Mice received a 60 s brain cryoinjury and were immediately injected with either PSS-794 or Tracer-794. Mice were sacrificed 24 h post-probe injection and the brains were excised and flash frozen in OCT. The brains were cut into 10  $\mu\text{m}$  sections and counterstained with DAPI and anti-caspase-3 antibody. Images were acquired at the site of the cryoinjury. Scale bar = 200  $\mu\text{m}$ .



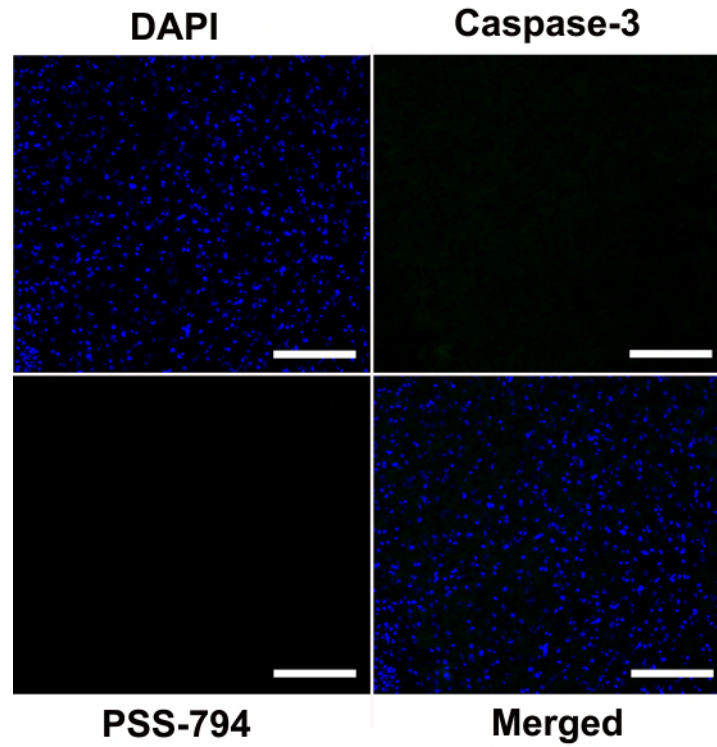

**Figure S6.** Fluorescence microscopy of histological sections from healthy brain tissue. Mice received a 60 s brain cryoinjury and were immediately injected with PSS-794. Mice were sacrificed 24 h post-probe injection and the brains were excised and flash frozen in OCT. The brains were cut into 10  $\mu\text{m}$  sections and counterstained with DAPI and anti-caspase-3 antibody. Images were acquired in an area of the brain that was not affected by the cryoinjury. Scale bar = 200  $\mu\text{m}$ .

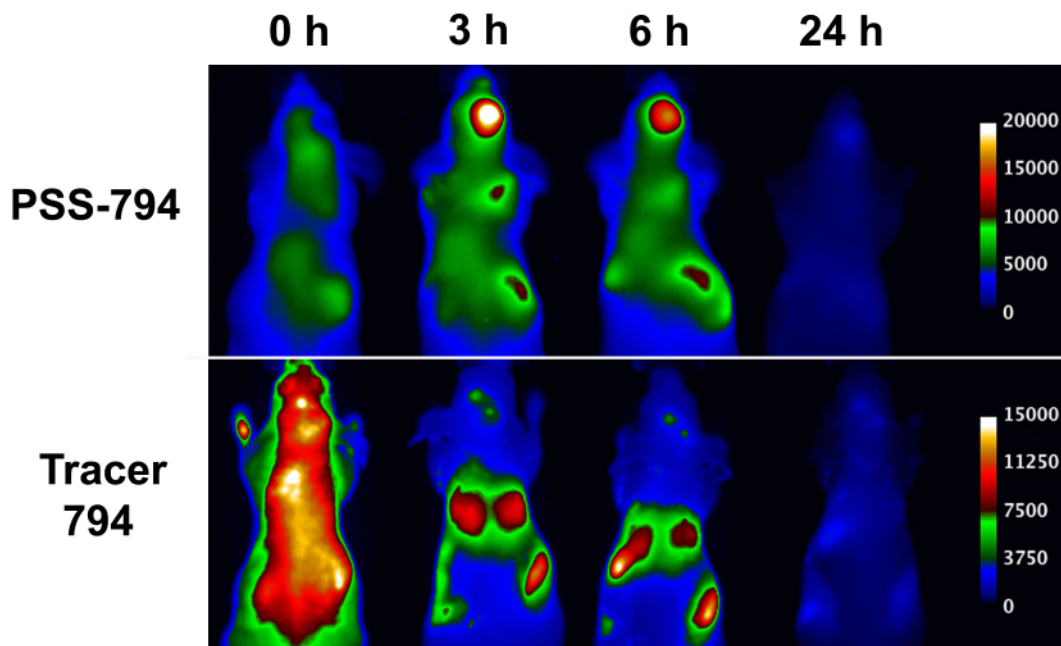

**Figure S7.** Representative *in vivo* near-infrared fluorescence montage of mice with a 20 s brain cryoinjury. Both cohorts of mice were anesthetized and a pre-cooled metal cylinder was applied to each mouse's head for 20 s. The mice were dosed with either PSS-794 or Tracer-794 immediately after the cryoinjury. Images were acquired at the indicated time points after probe injection. The calibration bar applies to all images. N = 5.

**Table S3.** T/NT values for PSS-794 and Tracer-794 at the cryolesion site in the 60 s and 20 s brain cryolesion mouse model. The data is displayed in graphical form in Figure 5. T/NT values  $\pm$  standard error of the mean.

|      | <b>PSS-794</b>                 |                               | <b>Tracer-794</b> |                 |
|------|--------------------------------|-------------------------------|-------------------|-----------------|
|      | 60 s cryolesion                | 20 s cryolesion               | 60 s cryolesion   | 20 s cryolesion |
| 0 h  | 2.52 $\pm$ 0.07                | 2.48 $\pm$ 0.12               | 2.52 $\pm$ 0.42   | 2.00 $\pm$ 0.16 |
| 3 h  | 6.77 $\pm$ 0.47 <sup>§§§</sup> | 4.67 $\pm$ 0.24 <sup>**</sup> | 3.52 $\pm$ 0.59   | 2.36 $\pm$ 0.31 |
| 6 h  | 7.32 $\pm$ 0.78 <sup>§</sup>   | 4.07 $\pm$ 0.72 <sup>*</sup>  | 3.81 $\pm$ 0.90   | 2.45 $\pm$ 0.41 |
| 24 h | 5.93 $\pm$ 1.15 <sup>§§</sup>  | 2.68 $\pm$ 0.20               | 2.97 $\pm$ 0.69   | 2.38 $\pm$ 0.35 |

\* P < 0.03, \*\* P < 0.002

§ P < 0.05, §§ P < 0.02, §§§ P < 0.01 (when comparing 60 s to 20 s cryolesion)

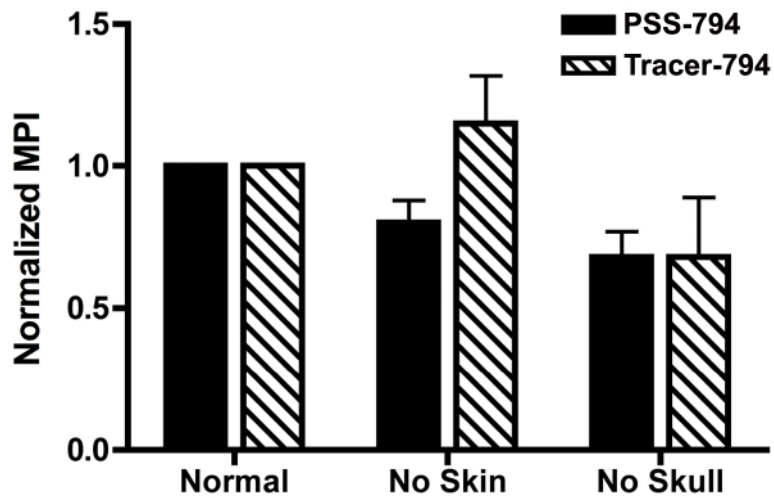

**Figure S8.** Comparison of PSS-794 and Tracer-794 localization at the cryoinjury site in different tissues. A pre-cooled metal cylinder was applied to the heads of mice for 20 s, and each mouse was dosed with either PSS-794 or Tracer-794. A region of interest (ROI) was drawn around the cryoinjury site in the 24 h *in vivo* (normal) images, images with the skin removed (no skin), and images with both the skin and skull removed (no skull) at 24 h post-probe injection. The mean pixel intensities (MPI) were recorded and normalized to the mean pixel intensity from the *in vivo* image. Normalized MPI  $\pm$  standard error of the mean. N = 5.

**Table S4.** Normalized mean pixel intensities of PSS-794 and Tracer-794 at the cryoinjury site in the 20 s brain cryoinjury mouse model. The data is displayed in graphical form in Figure S8. Normalized mean pixel intensities  $\pm$  standard error of the mean.

|          | <b>PSS-794</b>  | <b>Tracer-794</b> |
|----------|-----------------|-------------------|
| Normal   | 1.00 $\pm$ 0.00 | 1.00 $\pm$ 0.00   |
| No Skin  | 0.80 $\pm$ 0.08 | 1.15 $\pm$ 0.17   |
| No Skull | 0.68 $\pm$ 0.09 | 0.68 $\pm$ 0.21   |

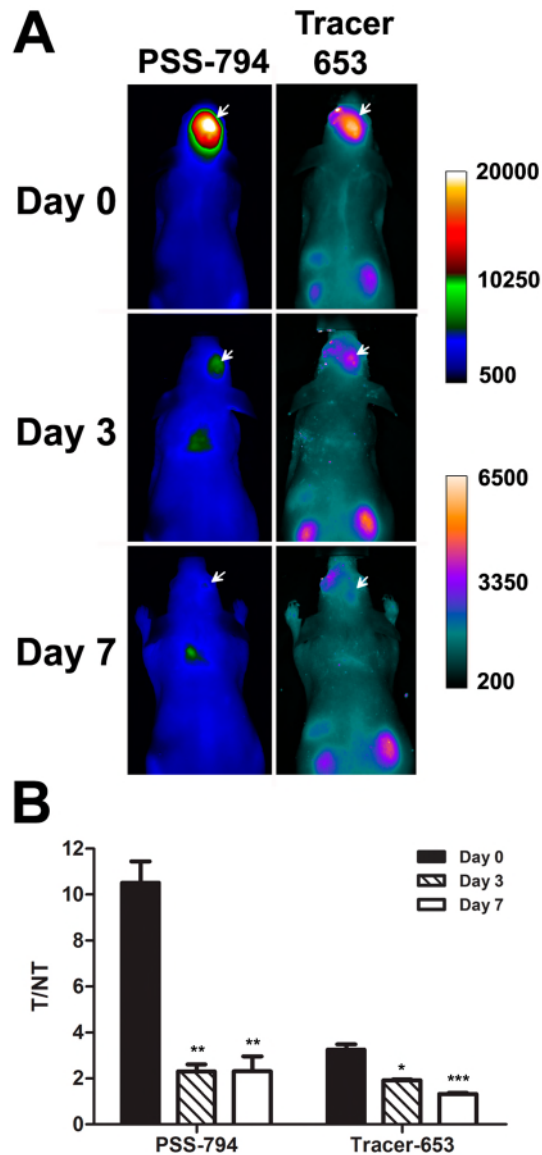

**Figure S9.** Representative *in vivo* near-infrared fluorescence montages of PSS-794 and Tracer-653 accumulation in a brain cryoinjury mouse model (A). Three cohorts of hairless mice were given a 60 s brain cryoinjury. Mice were then injected with a single dose of PSS-794 either immediately following cryoinjury (Day 0), 3 days post-cryoinjury (Day 3), or 7 days post-cryoinjury (Day 7). Each mouse was also injected with Tracer-653 at five hours post-PSS-794 injection. One hour after Tracer-653 injection, the mice were anesthetized and subjected to non-invasive epi-fluorescence imaging. Arrows denote the location of the cryolesion. *In vivo* quantification of PSS-794, and Tracer-653 accumulating in a 60 s brain cryoinjury mouse model (B). Target to non-target ratios (T/NT) were calculated by region of interest (ROI) analysis of the digital images. \* $P < 0.005$ , \*\* $P < 0.001$ . \*\*\* $P < 0.0002$ .

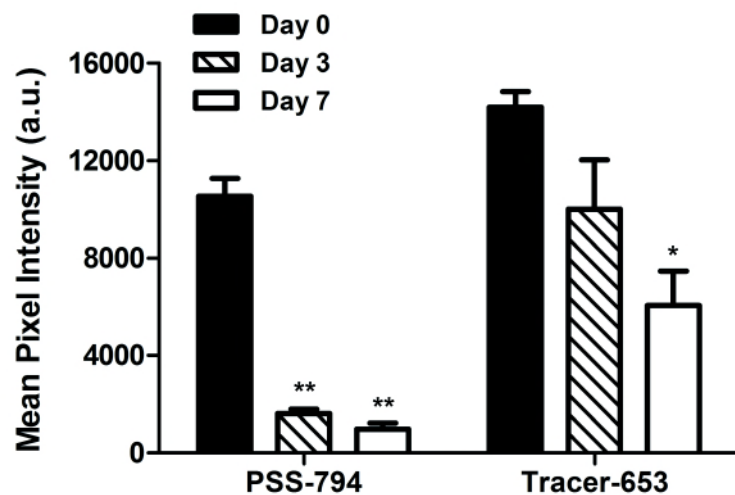

**Figure S10.** Comparison of PSS-794 and Tracer-653 in brain sections taken from mice that were dosed with probe at the following timepoints after cryoinjury, Day 0, Day 3, and Day 7. A region of interest was drawn around the area of the cryoinjury on the brain, and the mean pixel intensity was recorded. Mean pixel intensity  $\pm$  standard error of the mean. \*P < 0.05, \*\*P < 0.0002. N = 3-4.

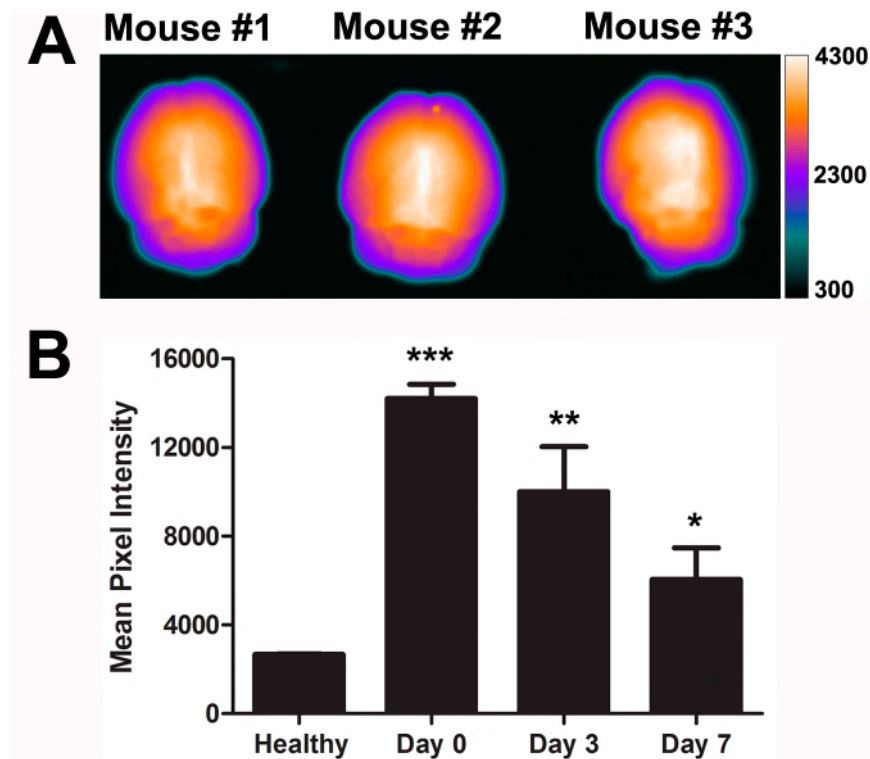

**Figure S11.** Comparison of Tracer-653 accumulation in healthy mouse brains and in cryoinjured mouse brains. *Ex vivo* fluorescence images of brains from healthy, hairless mice that were injected with Tracer-653 (A). Healthy, hairless mice (n = 3) were injected intravenously with Tracer-653 (2 mg/kg in 100  $\mu$ L H<sub>2</sub>O). Following one hour, the mice were anesthetized, sacrificed, and the brains were excised for *ex vivo* epi-fluorescence imaging. Calibration bar applies to all images. Bar graph of Tracer-653 mean pixel intensities of brains taken from healthy mice or cryoinjured mice that were dosed with probe at the designated timepoints after cryoinjury, (B). A region of interest was drawn around the area of the cryolesion on the injured brain or on a similar anatomical location on the healthy brain, and the mean pixel intensity was recorded. Mean pixel intensity  $\pm$  standard error of the mean. \*P < 0.05, \*\*P < 0.02, \*\*\*P < 0.0001 when compared to healthy. N = 3-4.



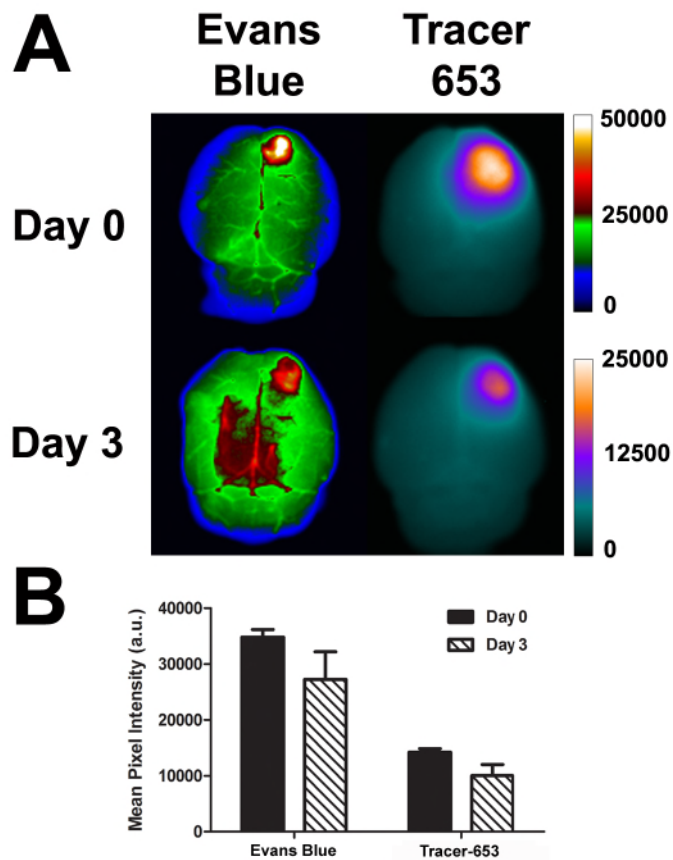

**Figure S12.** Comparison between Evans Blue and Tracer-653 accumulation into cryoinjured mouse brains. *Ex vivo* fluorescence images of Evans Blue and Tracer-653 in brains excised from mice that were dosed with probe either 6 h (Day 0) or 3 days (Day 3) after cryoinjury (A). Bar graph of Evans Blue and Tracer-653 mean pixel intensities at the site of the cryoinjury (B). A region of interest was drawn around the area of the cryoinjury on the brain, and the mean pixel intensity was recorded. Mean pixel intensity  $\pm$  standard error of the mean. N = 3-4.
